# Supplementary material for: Green innovative fluorescence approach for the feasible and reliable assay of thiol-containing drugs; captopril as a model
Source: Royal Society of Chemistry journal article supplement (doi:10.1039/d2ra02408j), 2022-01-01
Supplement: d2ra02408j1.pdf [file d2ra02408j1.pdf]

## Supplementary material

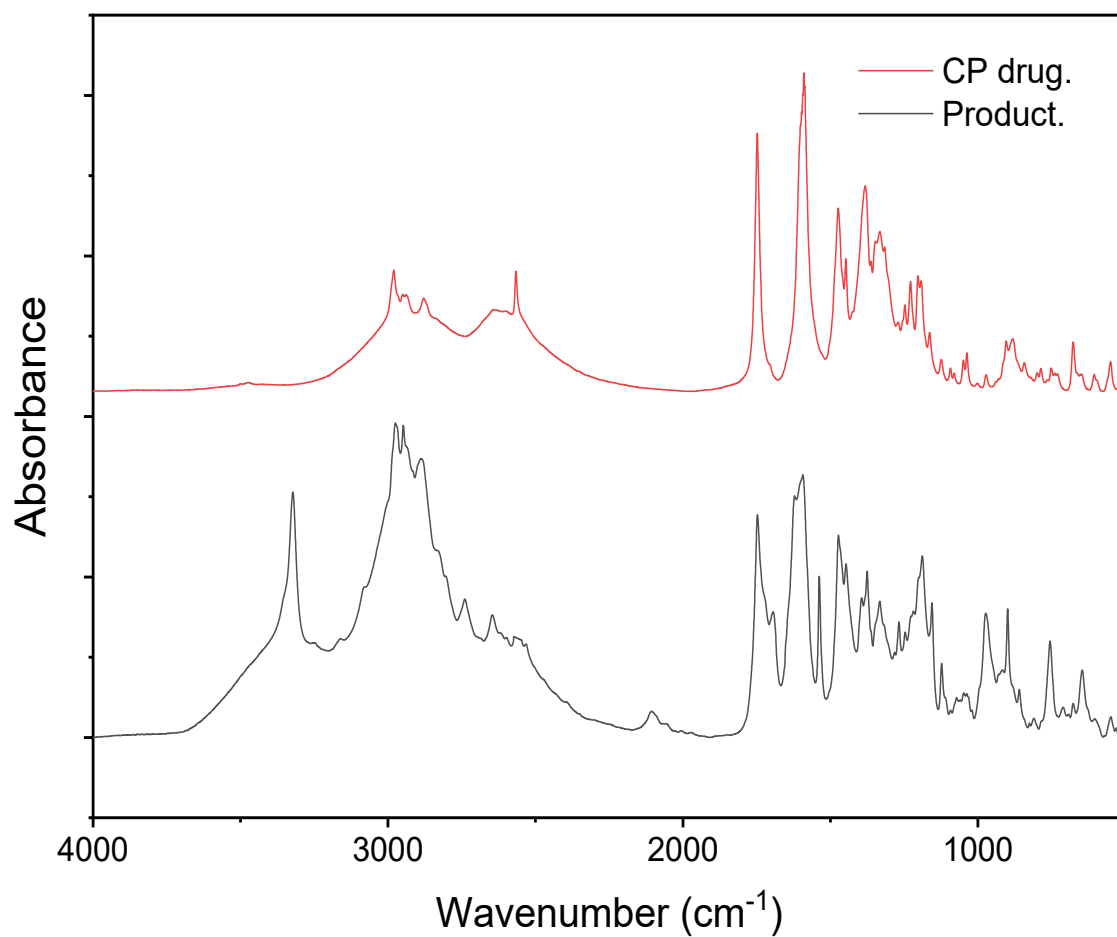

**ESI, 1†:** The confirmational FTIR spectra of pure CP drug and the developed product.
